# Supplementary material
Source: publisher site journal article supplement (https://www.dovepress.com/article/439307)
Supplement: Supplementary file 1 [file get_supplementary_file.php]

**Supplemental Table S1** Adjusted and unadjusted odds ratios for selected exposures and COPD LLN Stage 1+, among never smokers, BOLD Australia

| **Exposure Variables** | **Unadjusted**  **OR (95% CI)** | **Adjusted**  **OR (95% CI)** | **Minimum and Additional**  **Adjusted Covariates** |
| --- | --- | --- | --- |
| Age Group |  |  | Secondhand Tobacco Smoke (Home), BMI, Breathing Problems before Age 10 years, Years of Education, Family History of Respiratory Disease.  Additional Adjustments: Asthma, Work in Dusty Job (>1yr) |
| 40-49 years |  | 1 |
| 50-59 years | 0.79 (0.40, 1.59) | 1.73 (0.34, 1.55) |
| 60-69 years | 1.34 (0.70, 2.60) | 1.65 (0.80, 3.40) |
| ≥70 years | 1.65 (0.87, 3.14) | **2.11 (1.03, 4.34)** |
| BMI |  |  | Secondhand Tobacco Smoke (Home), Age Group, Asthma, Breathing Problems before Age 10 years, Family History of Respiratory Disease, Vapours, Gases and Fumes (VGF), Work Dusty Job (>1yr) |
| Normal | 1 | 1 |
| Low | 1.73 (0.58, 5.22) | 1.79 (0.53, 6.04) |
| Overweight/Obese | 0.70 (0.43, 1.14) | 0.63 (0.37, 1.07) |
| Years of Education (>12 years) | 0.63 (0.36, 1.11) | 0.77 (0.42, 1.43) | Secondhand Tobacco Smoke (Home), Age Group, BMI, VGF, Work Dusty Job (>1yr).  Additional Adjustments: Asthma, Breathing Problems before Age 10 years, Family History of Respiratory Disease |
| Asthma | **6.44 (4.01, 10.40)** | **5.00 (3.03, 8.25)** | Secondhand Hand Tobacco Smoke (Home), BMI, Breathing Problems before Age 10 years, Family History of Respiratory Disease, VGF, Work Dusty Job (>1yr) |
| Family History of Respiratory Disease | 1.40 (0.81, 2.41) | 1.37 (0.77, 2.46) | Secondhand Hand Tobacco Smoke (Home), Age Group, Asthma, BMI, Breathing Problems before Age 10 years, VGF, Work Dusty Job (>1yr). Additional Adjustments: Educational Level Attained |
| Breathing Problems before Age 10 years | **6.46 (3.73, 11.2)** | **4.52 (2.45, 8.32)** | Secondhand Hand Tobacco Smoke (Home), Age Group, Asthma, BMI, Family History of Respiratory Disease, VGF, Work Dusty Job (>1yr) |
| Secondhand Tobacco Smoke (home) | 1.49 (0.67, 3.34) | 2.01 (0.84, 4.79) | Age Group, Asthma, BMI, Breathing Problems before Age 10 years, Family History of Respiratory Disease, VGF, Work Dusty Job (>1yr |
| Work in Dusty Job (>1year) | 1.52 (0.99, 1.05) | 1.33 (0.77, 2.28) | Secondhand Hand Tobacco Smoke (Home), Years of Education, Asthma, BMI, Breathing Problems before Age 10 years, Family History of Respiratory Disease, VGF |
| Occupational Exposure to Gases, Vapors, and Fumes | 1.31 (0.62, 2.79) | 1.30 (0.57, 2.9) | Secondhand Hand Tobacco Smoke (Home), Years of Education, Asthma, BMI, Breathing Problems before Age 10 years, Family History of Respiratory Disease, Work Dusty Job (>1yr) |

**Notes:** BMI: Low (<20 kg/m2), Normal (20-25 kg/m2), Overweight/Obese (>25 kg/m2).
Each covariate was run as a separate exposure variable. Adjusted covariates are shown.
Direct effects models were fitted. Statistics in bold are significant at α<0.05.

**Abbreviations:** BMI, Body Mass Index; BOLD,` Burden of Obstructive Lung Disease; CI, Confidence Interval; COPD, Chronic Obstructive Pulmonary Disease; LLN, Lower Limit f Normal; OR, Odds Ratio; VGF, Vapors, Gases and Fumes; Yr, Year
